# Supplementary material for: Risk of Thromboembolic Events and Associated Healthcare Costs in Patients with Inflammatory Bowel Disease
Source: PubMed Central journal article supplement — Adv Ther. 2021 Dec 7;39(1):738–53. doi: 10.1007/s12325-021-01973-7 (PMC8799565; doi:10.1007/s12325-021-01973-7), 2021-12-07
Supplement: 12325_2021_1973_MOESM1_ESM.pdf [file 12325_2021_1973_MOESM1_ESM.pdf]

Risk of thromboembolic events and associated healthcare costs in patients with inflammatory bowel disease

Juliana Setyawan<sup>a</sup>, Fan Mu<sup>b</sup>, Miriam L. Zichlin<sup>b</sup>, Emma Billmyer<sup>b</sup>, Nathaniel Downes<sup>b</sup>, Hongbo Yang<sup>b</sup>, Nassir Azimi<sup>c</sup>, Vibeke Strand<sup>d</sup>, Andres Yarur<sup>e</sup>

<sup>a</sup>Arena Pharmaceuticals, Inc., San Diego, California, United States

<sup>b</sup>Analysis Group Inc., Boston, Massachusetts, United States

<sup>c</sup>Sharp Grossmont Hospital, La Mesa, California, United States

<sup>d</sup>Division of Immunology and Rheumatology, Stanford University School of Medicine, Palo Alto, California, United States

<sup>e</sup>Division of Gastroenterology and Hepatology, Medical College of Wisconsin, Milwaukee, Wisconsin, United States

**Corresponding Author:** Fan Mu (Email: [Fan.Mu@analysisgroup.com](mailto:Fan.Mu@analysisgroup.com))

## Supplemental Material

### *Online Resource 1. Codes to identify comorbidities of interest*

| <b>Comorbidity</b>              | <b>ICD-9</b>                                                                                                      | <b>ICD-10</b>                                                                                                                        |
|---------------------------------|-------------------------------------------------------------------------------------------------------------------|--------------------------------------------------------------------------------------------------------------------------------------|
| <b>Immune-mediated disease</b>  |                                                                                                                   |                                                                                                                                      |
| Ankylosing spondylitis          | 720.0                                                                                                             | M45                                                                                                                                  |
| Atopic dermatitis               | 691.8                                                                                                             | L20                                                                                                                                  |
| Inflammatory bowel disease      | 555, 556                                                                                                          | K50, K51                                                                                                                             |
| Multiple sclerosis              | 340                                                                                                               | G35                                                                                                                                  |
| Psoriasis                       | 696.1, 696.8                                                                                                      | L40.0, L40.1, L40.2, L40.3, L40.4, L40.8, L40.9                                                                                      |
| Psoriatic arthritis             | 696.0                                                                                                             | L40.5                                                                                                                                |
| Rheumatoid arthritis            | 714.0-714.2                                                                                                       | M05, M06                                                                                                                             |
| Systemic lupus erythematosus    | 695.4, 710.0                                                                                                      | L93, M32                                                                                                                             |
| <b>Venous thromboembolism</b>   |                                                                                                                   |                                                                                                                                      |
| Deep venous thromboembolism     | 451.1, 451.2, 451.81, 451.83, 451.84, 451.89, 451.9, 452, 453.2, 453.3, 453.4, 453.82-453.89, 453.9, 671.3, 671.4 | I80.1, I80.2, I80.3, I80.8, I80.9, I81, I82.2x0, I82.3, I82.4, I82.60, I82.62, I82.890, I82.90, I82.A1, I82.B1, I82.C1, O22.3, O87.1 |
| Pulmonary embolism              | 415.1                                                                                                             | I26                                                                                                                                  |
| <b>Arterial thromboembolism</b> |                                                                                                                   |                                                                                                                                      |
| Ischemic stroke                 | 433.x1, 434.x1, 436                                                                                               | I63, I64                                                                                                                             |
| Myocardial infarction           | 410                                                                                                               | I21, I22                                                                                                                             |
| Cancer                          | 140-208, 209.0-209.3, 238.4, 238.6, 238.7, 289.83                                                                 | C00-C96, D45, D46, D47.3, D47.Z9, D75.81                                                                                             |
| <b>Cardiovascular diseases</b>  |                                                                                                                   |                                                                                                                                      |
| Atherosclerosis                 | 414.0, 414.3, 414.4, 429.2, 440                                                                                   | I25.1, I25.7, I25.81, I25.83, I25.84, I70                                                                                            |
| Atrial fibrillation             | 427.31                                                                                                            | I48.0, I48.1, I48.2, I48.91                                                                                                          |

|                                       |                                                                                     |                                                                                       |
|---------------------------------------|-------------------------------------------------------------------------------------|---------------------------------------------------------------------------------------|
| Heart failure                         | 398.91, 402.01, 402.11, 402.91, 404.01, 404.03, 404.11, 404.13, 404.91, 404.93, 428 | I09.81, I11.0, I13.0, I13.2, I50                                                      |
| Hyperlipidemia                        | 272                                                                                 | E78                                                                                   |
| Hypertension                          | 401-405                                                                             | I10-I15                                                                               |
| Chronic kidney disease                | 585                                                                                 | N18                                                                                   |
| Chronic obstructive pulmonary disease | 491, 492, 493.2, 496                                                                | J41, J42, J43, J44                                                                    |
| Diabetes                              |                                                                                     |                                                                                       |
| Type 1                                | 2501, 2503                                                                          | E10                                                                                   |
| Type 2                                | 2500, 2502                                                                          | E11                                                                                   |
| Fracture (hip or leg)                 | 820, 821, 823                                                                       | S72, S82.1, S82.2, S82.3, S82.4, S82.81, S82.82, S82.83, S82.87                       |
| Peripheral vascular disease           | 093.0, 437.3, 440, 441, 443.1-443.9, 447.1, 557.1, 557.9, V43.4                     | I70, I71, I73.1, I73.8, I73.9, I77.1, I79.0, I79.2, K55.1, K55.8, K55.9, Z95.8, Z95.9 |
| Pregnancy                             | 630-679, V22, V23, V24, V28                                                         | O00-O99, Z34, Z36, Z39                                                                |

ICD-9 (ICD-10), International Classification of Diseases, Ninth (Tenth) Revision

*Online Resource 2. Codes to identify drugs of interest*

| <b>Drug</b>                          | <b>GPI</b>                                                 |
|--------------------------------------|------------------------------------------------------------|
| <b>Non-immune-mediating drugs</b>    |                                                            |
| Anticoagulants                       | 83x                                                        |
| Hormone replacement therapies        | 24x, 26x                                                   |
| Oral contraceptives                  | 2510x, 2599x                                               |
| Testosterone replacement therapies   | 2310x                                                      |
| <b>Immune-mediating drugs</b>        |                                                            |
| JAK inhibitors                       | 215375x, 666030x                                           |
| Biologics                            |                                                            |
| IL inhibitors                        |                                                            |
| IL-1                                 | 6626001000                                                 |
| IL-4                                 | 9027302000                                                 |
| IL-6                                 | 6650x                                                      |
| IL-17                                | 9025057500, 9025055400, 9025052000                         |
| IL-23                                | 9025058500, 9025058010, 9025054200, 5250407000, 9025057000 |
| TNF inhibitors                       | 525050x, 6627x, 6629x                                      |
| Interferon beta-1a                   | 6240306045                                                 |
| Other biologics                      |                                                            |
| Abatecept                            | 6640001000                                                 |
| Belimumab                            | 9942201500                                                 |
| Rituximab                            | 2135306000, 2135306010                                     |
| Natalizumab                          | 6240505000                                                 |
| Vedolizumab                          | 5250308000                                                 |
| Non-biologic immunomodulators        |                                                            |
| Methotrexate                         | 2130005000, 2130005010, 6625005000, 6625005010             |
| S1P receptor modulators <sup>1</sup> | 624070x                                                    |
| Other non-biologic immunomodulators  |                                                            |
| Azathioprine                         | 9940601000                                                 |

|                                         |                        |
|-----------------------------------------|------------------------|
| Cyclophosphamide                        | 2110102000             |
| Cyclosporine                            | 9940202000, 9940202030 |
| Hydroxychloroquine                      | 1300002010             |
| Leflunomide                             | 6628005000             |
| Mercaptopurine                          | 2130004000             |
| Mycophenolate mofetil                   | 9940303010, 9940303020 |
| Pimecrolimus                            | 9078406000             |
| Sulfasalazine                           | 5250006000             |
| Tacrolimus                              | 9940408000, 9078407500 |
| NSAIDs                                  | 6610x                  |
| Glucocorticoids                         | 2210x                  |
| 5-aminosalicylic-acid derivative agents | 5250x                  |

GPI, generic product identifier; IL, interleukin; JAK, Janus kinase; NSAIDs, nonsteroidal anti-inflammatory drugs; S1P, sphingosine 1-phosphate; TNF, tumor necrosis factor.

Note:

[1] The drugs included in S1P receptor modulators were fingolimod hydrochloride and siponimod fumarate.
